# Supplementary material for: Impact of diagnosis to treatment interval in patients with newly diagnosed mantle cell lymphoma
Source: PubMed Central journal article supplement — Blood Adv. 2022 Dec 15;7(11):2287–96. doi: 10.1182/bloodadvances.2022009225 (PMC10225877; doi:10.1182/bloodadvances.2022009225), 2022-12-15

## SUPPLEMENTAL APPENDIX

|                                                                       |           |
|-----------------------------------------------------------------------|-----------|
| <b>Table of Contents</b>                                              | <b>1</b>  |
| <b>Intensive induction therapies: Table S1</b>                        | <b>2</b>  |
| <b>PFS univariate analysis: Table S2</b>                              | <b>3</b>  |
| <b>OS univariate analysis: Table S3</b>                               | <b>4</b>  |
| <b>TTT as continuous variable: PFS MVA: Table S4</b>                  | <b>5</b>  |
| <b>TTT as continuous variable: OS MVA: Table S5</b>                   | <b>6</b>  |
| <b>Association of TTT with PFS after excluding ALLIANCE: Table S6</b> | <b>7</b>  |
| <b>Association of TTT with OS after excluding ALLIANCE: Table S7</b>  | <b>8</b>  |
| <b>PFS among recipients of intensive induction therapy: Figure S1</b> | <b>9</b>  |
| <b>Adjusted PFS: Figure S2</b>                                        | <b>10</b> |
| <b>OS among recipients of intensive induction therapy: Figure S3</b>  | <b>11</b> |
| <b>Adjusted OS: Figure S4</b>                                         | <b>12</b> |
| <b>DTI in weeks, PFS: Figure S5</b>                                   | <b>13</b> |
| <b>DTI in weeks, OS: Figure S6</b>                                    | <b>14</b> |
| <b>Spline curves: Figure S7</b>                                       | <b>15</b> |

**Table S1: Intensive induction therapies**

| <b>Cohort</b>        | <b>Regimen</b>                                                                             | <b>N</b> | <b>Total</b> |
|----------------------|--------------------------------------------------------------------------------------------|----------|--------------|
| ALLIANCE/CALGB 50403 | Augmented-dose-R-CHOP/methotrexate followed by HD-cytarabine (with stem cell mobilization) | 127      | 127          |
| MCL-RCS              | R-hyperCVAD                                                                                | 168      | 305          |
|                      | R-M-CHOP                                                                                   | 71       |              |
|                      | R-maxi-CHOP alternating with R-HD-cytarabine                                               | 20       |              |
|                      | R-CHOP alternating with R-DHAP                                                             | 34       |              |
|                      | BR alternating with R-HD-cytarabine                                                        | 6        |              |
|                      | R-DHAP                                                                                     | 6        |              |
| MER                  | R-HD-cytarabine based regimens                                                             | 23       | 45           |
|                      | R-hyperCVAD                                                                                | 22       |              |

Table S2: PFS UVA

| Covariate                    | N    | HR (95% CI)      | p-value         |
|------------------------------|------|------------------|-----------------|
| Time to first treatment      |      |                  |                 |
| 15-60 days                   | 797  | Referent         |                 |
| 0-14 days                    | 300  | 1.69 (1.43-2.00) | <b>&lt;.001</b> |
| Age at diagnosis, continuous | 1094 | 1.02 (1.01-1.03) | <b>&lt;.001</b> |
| Sex                          |      |                  |                 |
| Female                       | 256  | Referent         |                 |
| Male                         | 840  | 1.27 (1.04-1.55) | <b>0.02</b>     |
| Race                         |      |                  |                 |
| White                        | 970  | Referent         |                 |
| Black                        | 40   | 0.99 (0.62-1.59) | 0.98            |
| Others                       | 40   | 1.17 (0.74-1.86) | 0.49            |
| ECOG PS                      |      |                  |                 |
| 0                            | 601  | Referent         |                 |
| 1                            | 335  | 1.48 (1.24-1.76) | <b>&lt;.001</b> |
| ≥2                           | 67   | 2.20 (1.62-2.99) | <b>&lt;.001</b> |
| Ann Arbor Stage              |      |                  |                 |
| 1-3                          | 152  | Referent         |                 |
| 4                            | 934  | 1.39 (1.10-1.76) | <b>0.006</b>    |
| LDH                          |      |                  |                 |
| Normal                       | 514  | Referent         |                 |
| Elevated                     | 332  | 1.63 (1.35-1.96) | <b>&lt;.001</b> |
| BM involvement               |      |                  |                 |
| No                           | 165  | Referent         |                 |
| Yes                          | 802  | 1.51 (1.19-1.92) | <b>&lt;.001</b> |
| B symptoms                   |      |                  |                 |
| No                           | 738  | Referent         |                 |
| Yes                          | 309  | 1.31 (1.09-1.57) | <b>0.003</b>    |
| MIPI                         |      |                  |                 |
| <5.7                         | 339  | Referent         |                 |
| ≥5.7 <6.2                    | 220  | 1.48 (1.17-1.86) | <b>&lt;.001</b> |
| ≥6.2                         | 228  | 2.06 (1.64-2.58) | <b>&lt;.001</b> |
| Intensive induction therapy  |      |                  |                 |
| No                           | 617  | Referent         |                 |
| Yes                          | 477  | 0.63 (0.54-0.75) | <b>&lt;.001</b> |

Table S3: OS UVA

| Covariate                    | N    | HR (95% CI)      | p-value         |
|------------------------------|------|------------------|-----------------|
| Time to first treatment      |      |                  |                 |
| 15-60 days                   | 797  | Referent         |                 |
| 0-14 days                    | 300  | 1.66 (1.34-2.06) | <b>&lt;.001</b> |
| Age at diagnosis, continuous | 1094 | 1.04 (1.03-1.05) | <b>&lt;.001</b> |
| Sex                          |      |                  |                 |
| Female                       | 256  | Referent         |                 |
| Male                         | 840  | 1.32 (1.02-1.72) | <b>0.04</b>     |
| Race                         |      |                  |                 |
| White                        | 970  | Referent         |                 |
| Black                        | 40   | 0.82 (0.41-1.66) | 0.58            |
| Others                       | 40   | 0.88 (0.45-1.71) | 0.71            |
| ECOG PS                      |      |                  |                 |
| 0                            | 601  | Referent         |                 |
| 1                            | 335  | 1.47 (1.16-1.85) | <b>0.001</b>    |
| ≥2                           | 67   | 3.16 (2.24-4.45) | <b>&lt;.001</b> |
| Ann Arbor Stage              |      |                  |                 |
| 1-3                          | 152  | Referent         |                 |
| 4                            | 934  | 1.64 (1.19-2.27) | <b>0.003</b>    |
| LDH                          |      |                  |                 |
| Normal                       | 514  | Referent         |                 |
| Elevated                     | 332  | 2.05 (1.62-2.59) | <b>&lt;.001</b> |
| BM involvement               |      |                  |                 |
| No                           | 165  | Referent         |                 |
| Yes                          | 802  | 1.79 (1.29-2.47) | <b>&lt;.001</b> |
| B symptoms                   |      |                  |                 |
| No                           | 738  | Referent         |                 |
| Yes                          | 309  | 1.41 (1.13-1.77) | <b>0.003</b>    |
| MIPI                         |      |                  |                 |
| <5.7                         | 339  | Referent         |                 |
| ≥5.7 <6.2                    | 220  | 1.45 (1.06-1.97) | <b>0.02</b>     |
| ≥6.2                         | 228  | 2.88 (2.17-3.82) | <b>&lt;.001</b> |
| Intensive induction therapy  |      |                  |                 |
| No                           | 617  | Referent         |                 |
| Yes                          | 477  | 0.59 (0.47-0.74) | <b>&lt;.001</b> |

**Table S4: TTT as a continuous variable: PFS MVA**

| <b>Covariate</b>                   | <b>HR (95% CI)</b> | <b>p-value</b>  |
|------------------------------------|--------------------|-----------------|
| Time to first treatment (per week) | 0.86 (0.82-0.91)   | <b>&lt;.001</b> |
| MIPI                               |                    |                 |
| <5.7                               | Referent           |                 |
| ≥5.7 <6.2                          | 1.30 (1.02-1.65)   | <b>0.03</b>     |
| ≥6.2                               | 1.64 (1.29-2.08)   | <b>&lt;.001</b> |
| Intensive induction therapy        |                    |                 |
| No                                 | Referent           |                 |
| Yes                                | 0.71 (0.58-0.87)   | <b>0.001</b>    |

**Table S5: TTT as a continuous variable: OS MVA**

| <b>Covariate</b>                   | <b>HR (95% CI)</b>   | <b>p-value</b>  |
|------------------------------------|----------------------|-----------------|
| Time to first treatment (per week) | 0.91 (0.85-0.98)     | <b>0.009</b>    |
| MIPI                               |                      |                 |
| <5.7                               | Referent             |                 |
| ≥5.7 <6.2                          | 1.31 (0.95-1.80)     | 0.10            |
| ≥6.2                               | 2.47 (1.83-3.31)     | <b>&lt;.001</b> |
| Intensive induction therapy        |                      |                 |
| No                                 | Referent             |                 |
| Yes                                | 0.74 (0.57-0.961.20) | <b>0.02</b>     |

Table S6: Association of TTT with PFS (MVA) after excluding ALLIANCE patient cohort

| Covariate                   | HR (95% CI)      | p-value         |
|-----------------------------|------------------|-----------------|
| Time to first treatment     |                  |                 |
| 15-60 days                  | Referent         |                 |
| 0-14 days                   | 1.44 (1.13-1.82) | <b>0.003</b>    |
| Sex                         |                  |                 |
| Female                      | Referent         |                 |
| Male                        | 1.42 (1.07-1.89) | <b>0.01</b>     |
| Ann Arbor Stage             |                  |                 |
| 1-3                         | Referent         |                 |
| 4                           | 0.89 (0.54-1.45) | 0.63            |
| BM involvement              |                  |                 |
| No                          | Referent         |                 |
| Yes                         | 1.36 (0.86-2.16) | 0.19            |
| B symptoms                  |                  |                 |
| No                          | Referent         |                 |
| Yes                         | 1.14 (0.88-1.48) | 0.31            |
| MIPI                        |                  |                 |
| <5.7                        | Referent         |                 |
| ≥5.7 <6.2                   | 1.21 (0.91-1.60) | 0.19            |
| ≥6.2                        | 1.75 (1.31-2.32) | <b>&lt;.001</b> |
| Intensive induction therapy |                  |                 |
| No                          | Referent         |                 |
| Yes                         | 0.68 (0.53-0.88) | <b>0.003</b>    |

**Table S7: Association of TTT and OS (MVA) after excluding ALLIANCE patient cohort**

| <b>Covariate</b>            | <b>HR (95% CI)</b> | <b>p-value</b>  |
|-----------------------------|--------------------|-----------------|
| Time to first treatment     |                    |                 |
| 15-60 days                  | Referent           |                 |
| 0-14 days                   | 1.62 (1.21-2.16)   | <b>0.001</b>    |
| Sex                         |                    |                 |
| Female                      | Referent           |                 |
| Male                        | 1.61 (1.12-2.33)   | <b>0.01</b>     |
| Ann Arbor Stage             |                    |                 |
| 1-3                         | Referent           |                 |
| 4                           | 0.87 (0.43-1.76)   | 0.70            |
| BM involvement              |                    |                 |
| No                          | Referent           |                 |
| Yes                         | 1.36 (0.70-2.67)   | 0.36            |
| B symptoms                  |                    |                 |
| No                          | Referent           |                 |
| Yes                         | 1.01 (0.73-1.41)   | 0.94            |
| MIPI                        |                    |                 |
| <5.7                        | Referent           |                 |
| ≥5.7 <6.2                   | 1.43 (0.96-2.11)   | 0.08            |
| ≥6.2                        | 3.27 (2.24-4.77)   | <b>&lt;.001</b> |
| Intensive induction therapy |                    |                 |
| No                          | Referent           |                 |
| Yes                         | 0.55 (0.39-0.79)   | <b>0.001</b>    |



Figure S1: PFS between short DTI and long DTI among the recipients of intensive induction therapy

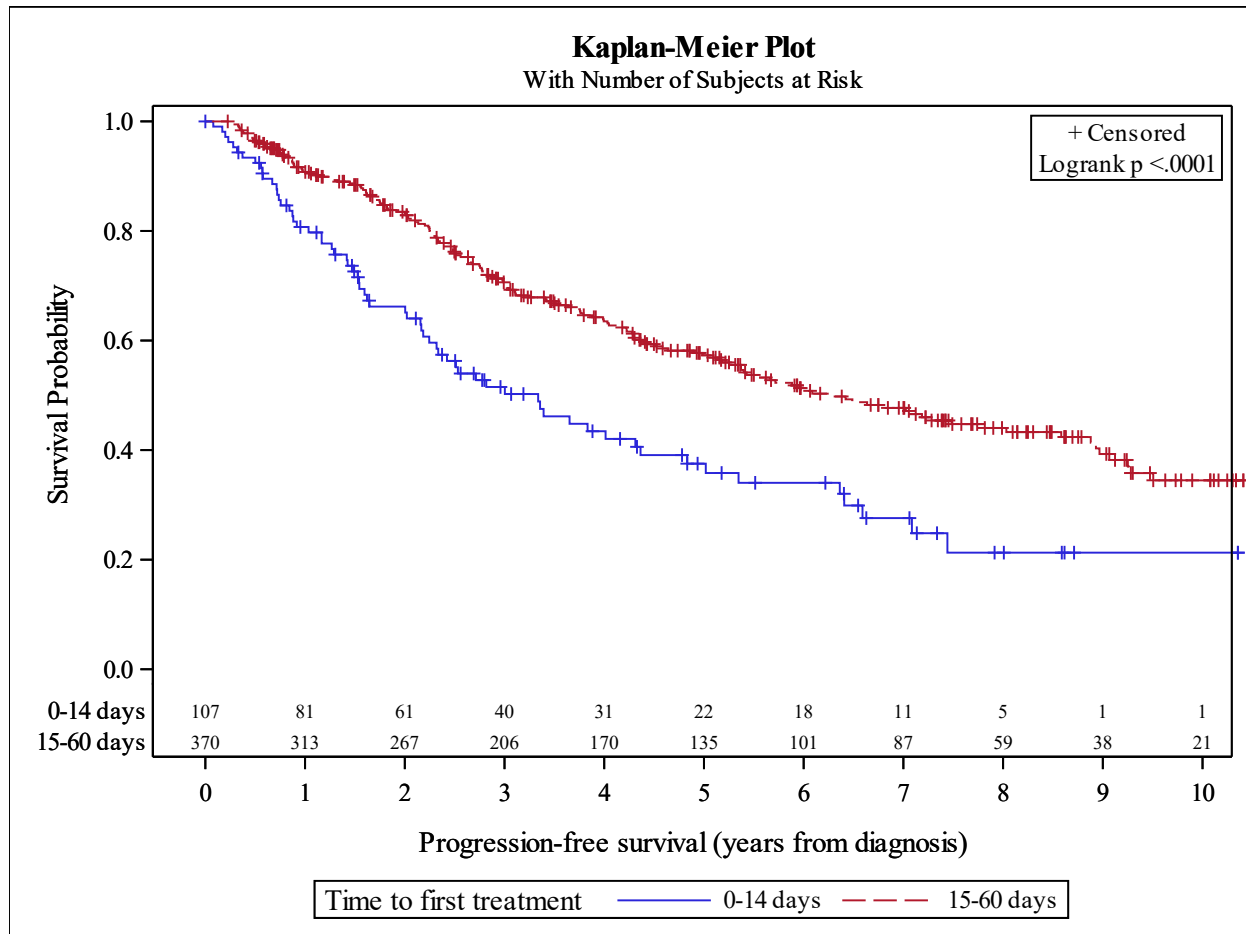

| Time to first treatment | No. of Subject | Event     | Censored  | Median Survival (95% CI) | Time to first treatment | 2 Yr Survival        | 5 Yr Survival        |
|-------------------------|----------------|-----------|-----------|--------------------------|-------------------------|----------------------|----------------------|
| 0-14 days               | 107            | 64 (60%)  | 43 (40%)  | 3.3 (2.2, 4.4)           | 0-14 days               | 66.2% (56.0%, 74.6%) | 37.5% (27.2%, 47.9%) |
| 15-60 days              | 370            | 171 (46%) | 199 (54%) | 6.3 (5.3, 8)             | 15-60 days              | 83.5% (79.1%, 87.0%) | 57.3% (51.5%, 62.7%) |

Figure S2: Adjusted PFS

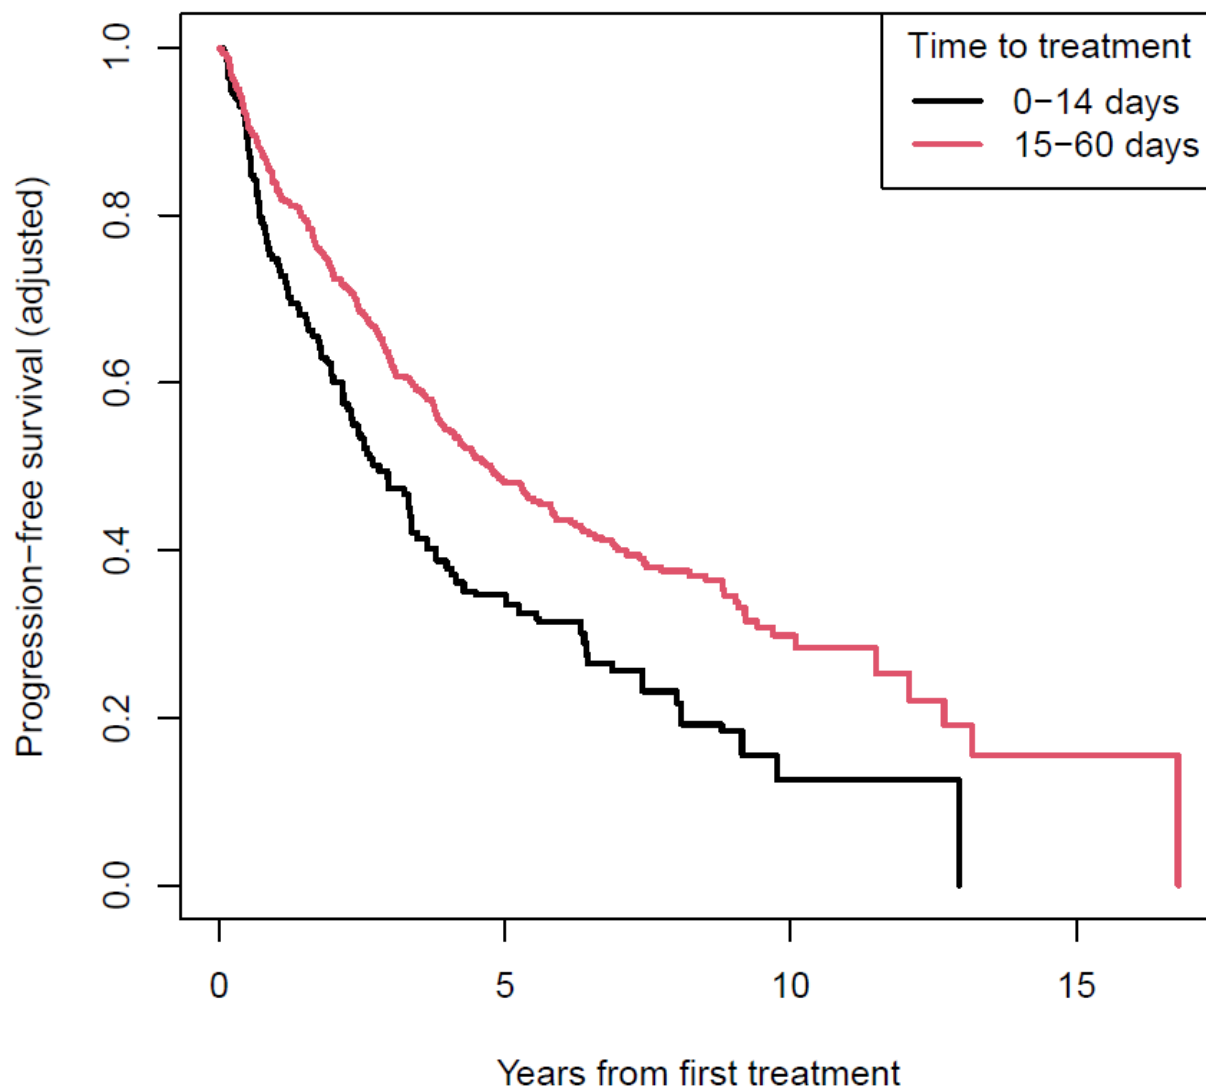

Figure S3: OS between short DTI and long DTI among the recipients of intensive induction therapy

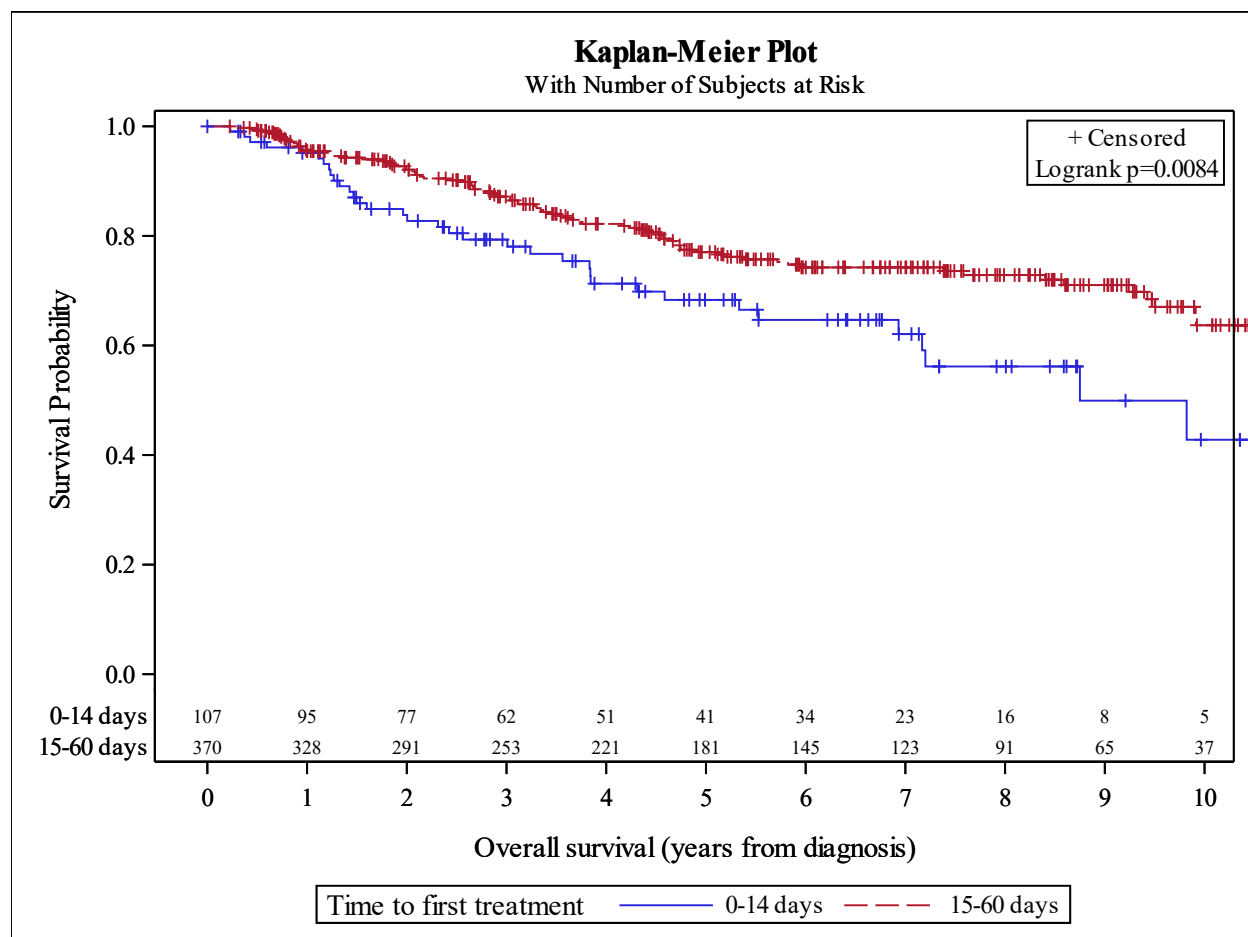

| Time to first treatment | No. of Subject | Event    | Censored  | Median Survival (95% CI) | Time to first treatment | 2 Yr Survival        | 5 Yr Survival        |
|-------------------------|----------------|----------|-----------|--------------------------|-------------------------|----------------------|----------------------|
| 0-14 days               | 107            | 35 (33%) | 72 (67%)  | 8.8 (6.9, NA)            | 0-14 days               | 83.8% (74.9%, 89.8%) | 68.3% (57.2%, 77.1%) |
| 15-60 days              | 370            | 86 (23%) | 284 (77%) | NA (11.6, NA)            | 15-60 days              | 92.1% (88.7%, 94.5%) | 77.0% (71.8%, 81.5%) |

Figure S4. Adjusted OS

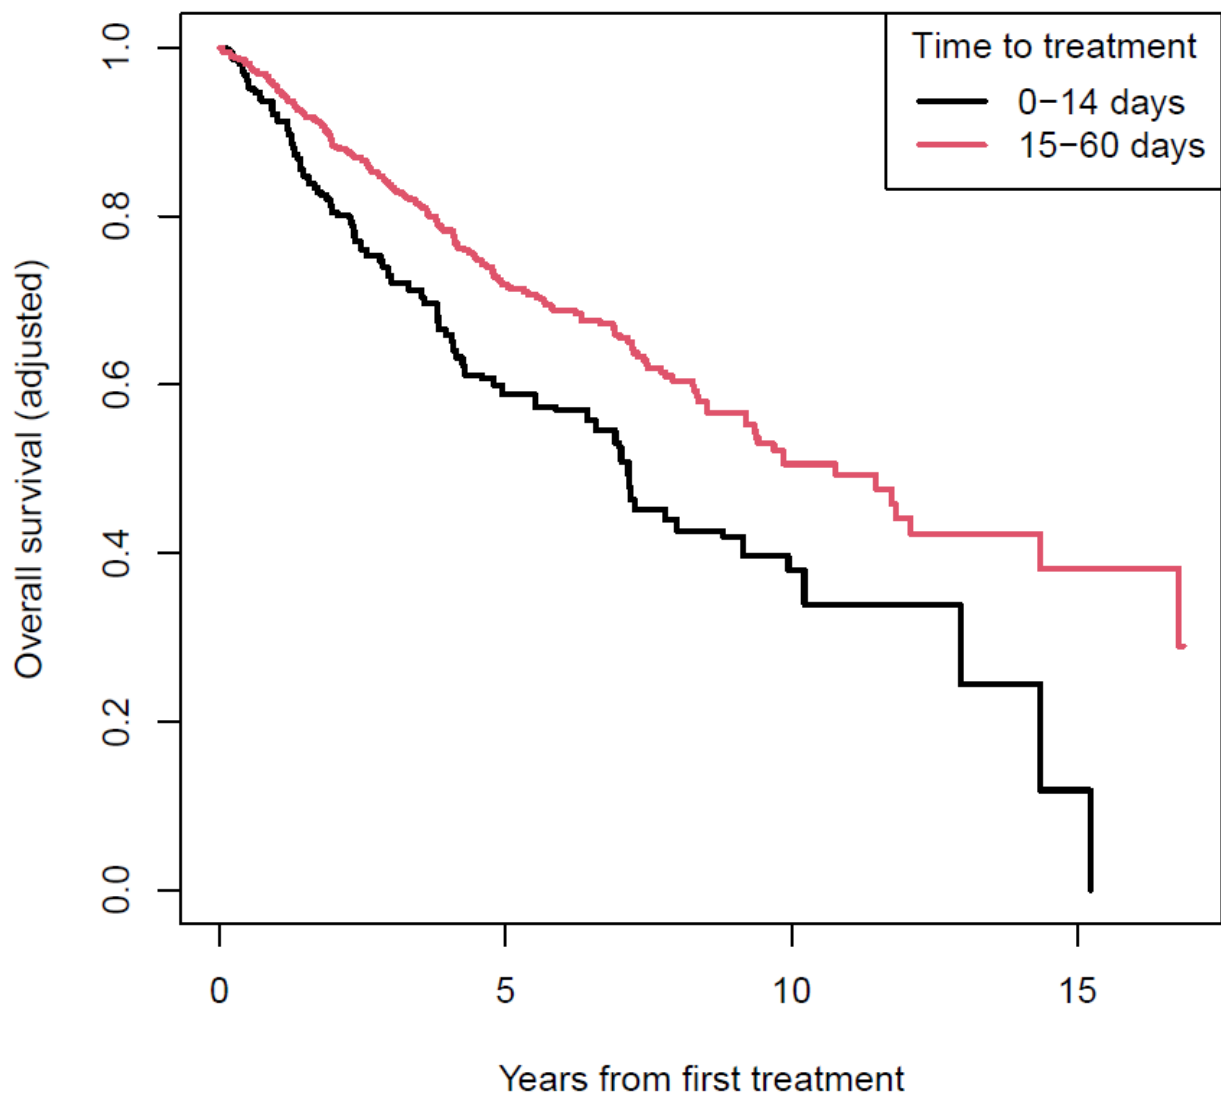

Figure S5. DTI in weeks - PFS

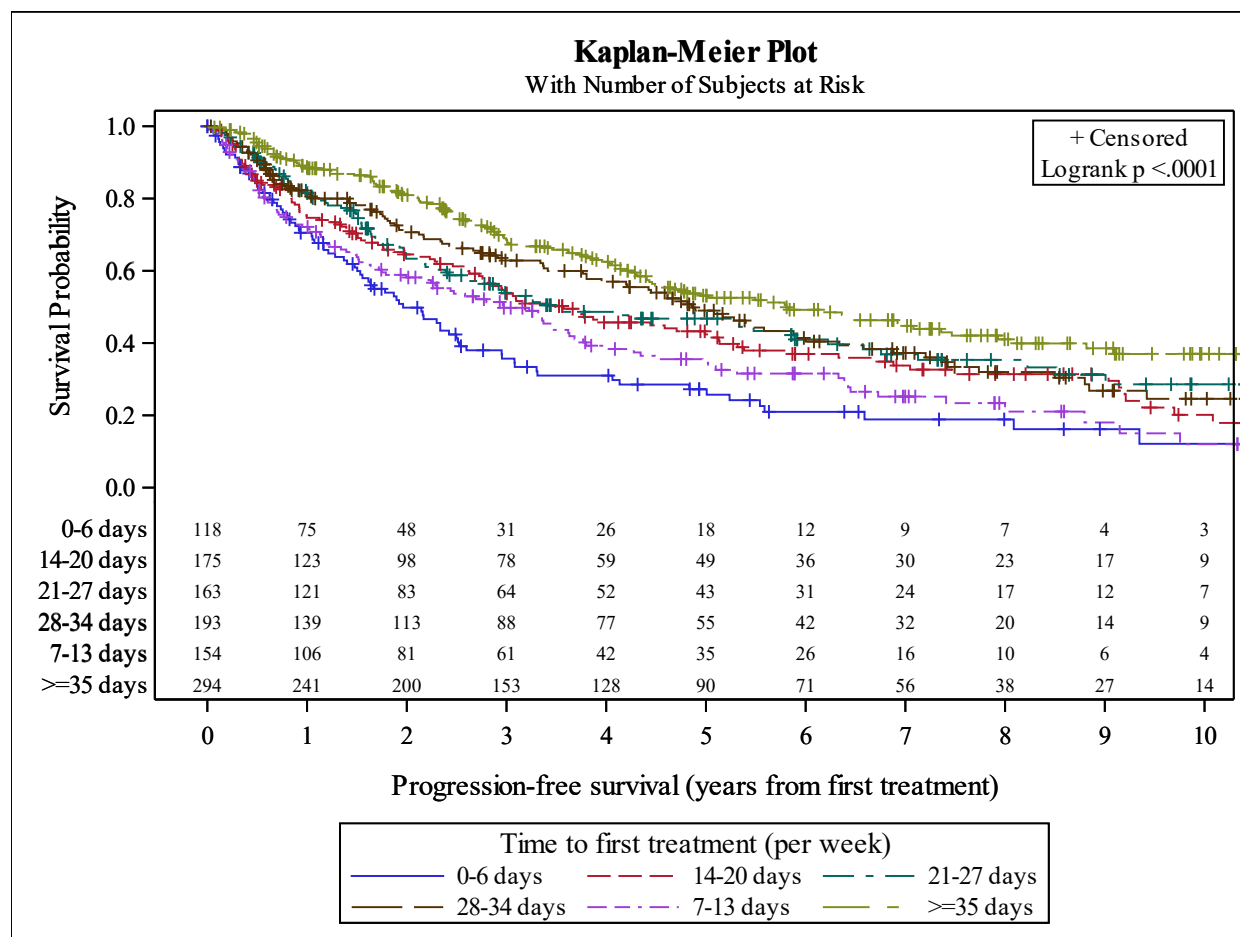

| Time to first treatment (per week) | No. of Subject | Event     | Censored  | Median Survival (95% CI) | DTI (per week) | 2 Yr Survival        | 5 Yr Survival        |
|------------------------------------|----------------|-----------|-----------|--------------------------|----------------|----------------------|----------------------|
| 0-6 days                           | 118            | 83 (70%)  | 35 (30%)  | 2 (1.5, 2.5)             | 0-6 days       | 49.8% (39.9%, 58.9%) | 27.2% (18.6%, 36.6%) |
| 7-13 days                          | 154            | 104 (68%) | 50 (32%)  | 3 (2, 3.7)               | 7-13 days      | 58.2% (49.8%, 65.7%) | 34.6% (26.4%, 42.9%) |
| 14-20 days                         | 175            | 112 (64%) | 63 (36%)  | 3.6 (2.8, 5)             | 14-20 days     | 64.6% (56.7%, 71.3%) | 42.4% (34.4%, 50.2%) |
| 21-27 days                         | 163            | 87 (53%)  | 76 (47%)  | 3.5 (2.6, 5.9)           | 21-27 days     | 63.4% (54.9%, 70.7%) | 46.8% (38.0%, 55.1%) |
| 28-34 days                         | 193            | 103 (53%) | 90 (47%)  | 4.9 (3.8, 5.9)           | 28-34 days     | 71.3% (64.0%, 77.4%) | 49.0% (40.7%, 56.7%) |
| >=35 days                          | 294            | 135 (46%) | 159 (54%) | 5.8 (4.5, 7.5)           | >=35 days      | 80.9% (75.7%, 85.1%) | 53.1% (46.4%, 59.4%) |

Figure S6. DTI in weeks - OS

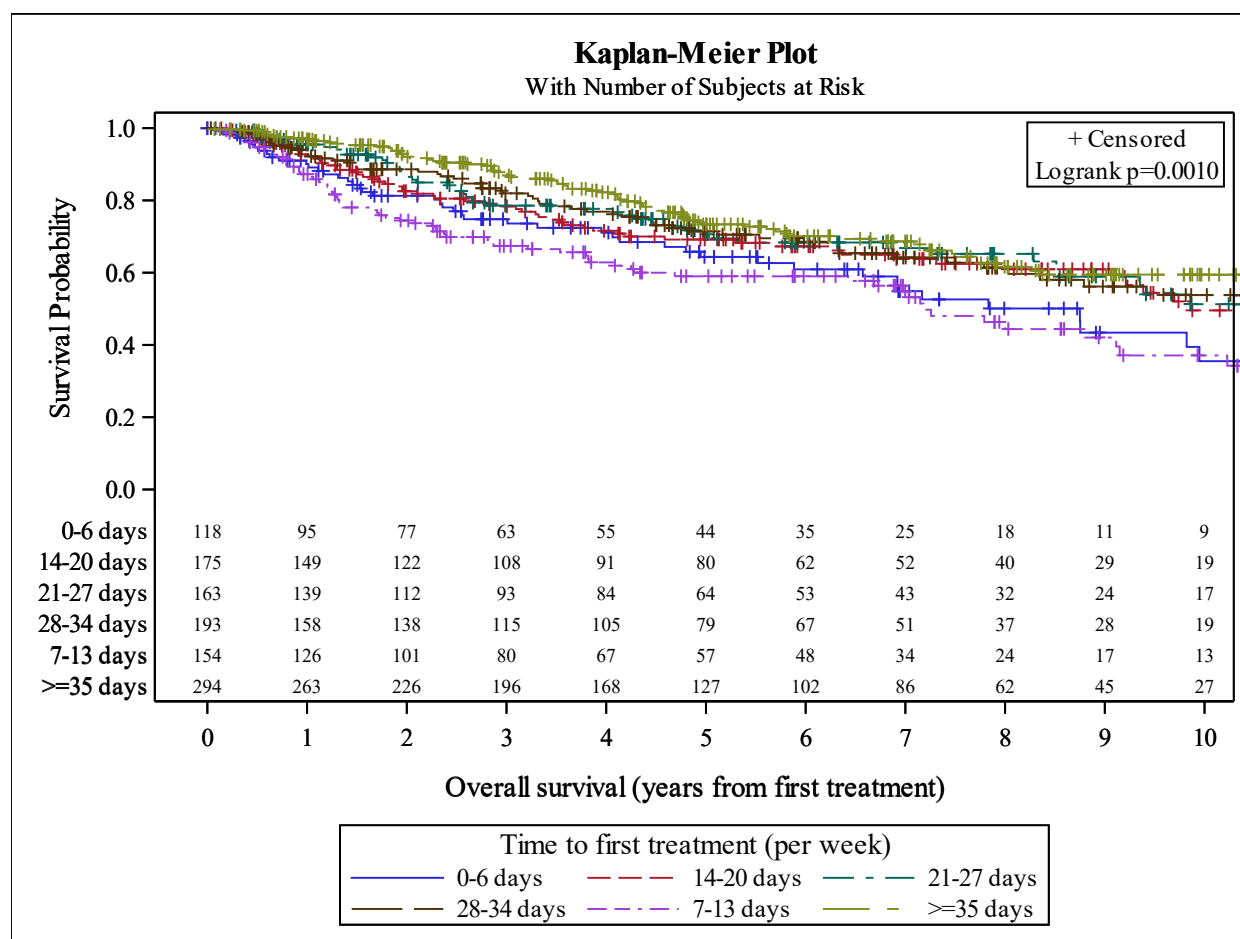

| Time to first treatment (per week) | No. of Subject | Event    | Censored  | Median            |                | 2 Yr Survival        | 5 Yr Survival        |
|------------------------------------|----------------|----------|-----------|-------------------|----------------|----------------------|----------------------|
|                                    |                |          |           | Survival (95% CI) | DTI (per week) |                      |                      |
| 0-6 days                           | 118            | 46 (39%) | 72 (61%)  | 8.8 (5.9, 15.2)   | 0-6 days       | 81.3% (72.5%, 87.5%) | 64.4% (53.6%, 73.3%) |
| 7-13 days                          | 154            | 70 (45%) | 84 (55%)  | 7.2 (4.7, 9.1)    | 7-13 days      | 74.4% (66.5%, 80.8%) | 59.0% (50.0%, 67.0%) |
| 14-20 days                         | 175            | 61 (35%) | 114 (65%) | 9.9 (9.2, NA)     | 14-20 days     | 82.6% (75.7%, 87.6%) | 69.2% (61.0%, 76.0%) |
| 21-27 days                         | 163            | 51 (31%) | 112 (69%) | 10.8 (8.5, NA)    | 21-27 days     | 86.5% (79.6%, 91.2%) | 70.6% (61.6%, 77.9%) |
| 28-34 days                         | 193            | 60 (31%) | 133 (69%) | 11.3 (8, NA)      | 28-34 days     | 88.6% (82.9%, 92.5%) | 71.5% (63.4%, 78.0%) |
| >=35 days                          | 294            | 81 (28%) | 213 (72%) | 12.1 (11.8, NA)   | >=35 days      | 92.1% (88.1%, 94.8%) | 73.3% (66.9%, 78.7%) |

Figure S7. Spline curves

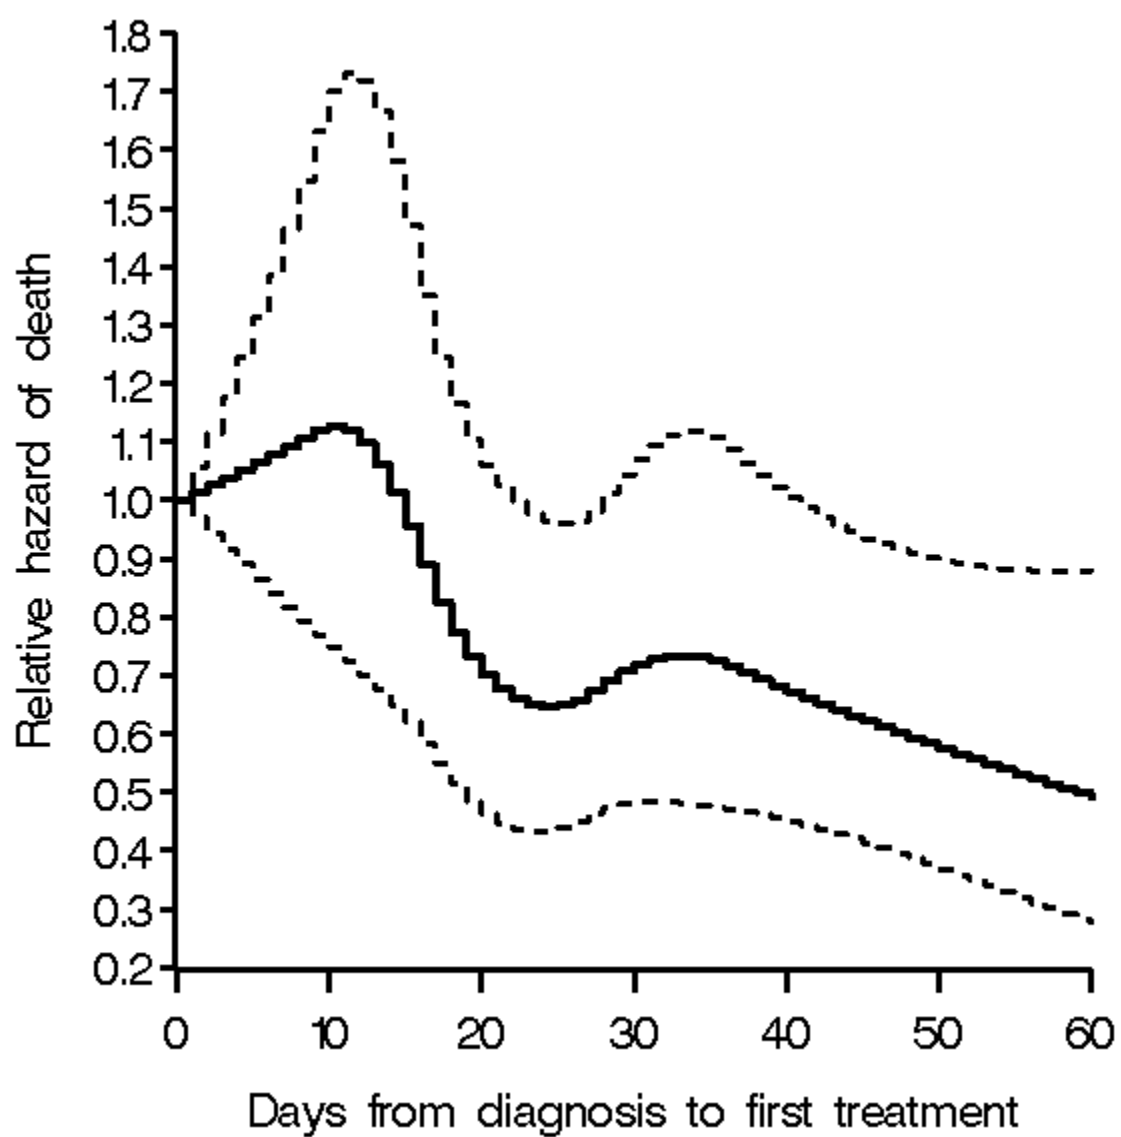

Supplement: BLOODA_ADV-2022-009225-mmc1.pdf [file BLOODA_ADV-2022-009225-mmc1.pdf]
